# Supplementary material
Source: ML conference proceedings conference paper supplement (https://proceedings.mlr.press/v164/kumar22a.html)
Supplement: Supplementary file 5 [file kumar22a-supp.zip]

Archive with 6 entries (5 files):
- corl_workflow_paper/
- __MACOSX/._corl_workflow_paper
- corl_workflow_paper/main_paper.pdf
- __MACOSX/corl_workflow_paper/._main_paper.pdf
- corl_workflow_paper/appendix.pdf
- __MACOSX/corl_workflow_paper/._appendix.pdf
